# Supplementary material
Source: publisher figshare collection journal article supplement (https://gsajournals.figshare.com/ndownloader/files/13481402)
Supplement: Supplementary file 1 [file 13481402]

## Sheet: Fig S1 
A
old name	new name		LG1																																											LG2
L. sativa cv Olof	L. sativa cv Olof
L. saligna	L. saligna
BIL1.2	BIL1A
1.2
BIL1.1	BIL1B
BIL2.1	BIL2A
2.1
BIL2.2	BIL2B
BIL2.3	BIL2C
BIL8.4	BIL3A
BIL8.3(+4.1s)	BIL3B(+4A-1)
BIL8.2	BIL3C
BIL8.1	BIL3D
BIL4.1	BIL4A
BIL4.2	BIL4B
BIL4.3	BIL4C
BIL4.4	BIL4D
BIL4.5	BIL4E
BIL4.6	BIL4F
BIL5.2	BIL5A
BIL5.1	BIL5B
BIL3.1	BIL6A
pBIL3.2	pBIL6B
BIL3.2	BIL6B-1
BIL3.3	BIL6C
BIL3.4	BIL6D
BIL7.1(+1.3)	BIL7A(+1A-1)
pBIL7.2	pBIL7B
BIL7.3(+5.2s)	BIL7D(+5A-1)
BIL6.3(+4.1)	BIL8A(+4A)
pBIL6.2	pBIL8B
BIL6.1	BIL8C
pBIL9.1	pBIL9A
BIL9.2	BIL9B
pBIL9.3	pBIL9C
B
BIL7.2-3+8.4	BIL7C+3A
BIL6.1+9.1	BIL8C+9A-1
Figure S1 Genetic composition of backcross inbred lines (BILs) per linkage group (LG) in cM.
Old names (as used in previous articles, and with previous map orientation) and new names (here, and new new map orientation) of BILs are provided.
(A). BILs with a homozygous L. saligna introgression segment (red) or occasionally a heterozygous introgression segment (yellow) in L. sativa background (blue).
(B) BILs with a homozygous L. saligna introgression at an HI locus and at its interactive locus that can nullify the HI .
These double introgression lines were only retrieved after directional combination with the conspecific allele at the interactive locus to nullify the HI.

## Sheet: Fig S2
A	Mendelian segregation
	allele frequency						genotype frequency
			pollen
			w	c
			0.5	0.5			zygote
egg	w	0.5	0.25	0.25			ww	cw/wc	cc
	c	0.5	0.25	0.25			0.25	0.5	0.25
B	Female gametophytic TRD
	allele frequency						genotype frequency
			pollen
			w	c
			0.5	0.5			zygote
egg	w	0.2	0.1	0.1			ww	cw/wc	cc
	c	0.8	0.4	0.4			0.1	0.5	0.4
C	Zygotic TRD
	example 1
	allele frequency						genotype frequency
			pollen
			w	c
			0.5	0.5			zygote					zygote
egg	w	0.5	0.25	0.25			ww	cw/wc	cc			ww	cw/wc	cc
	c	0.5	0.25	0.25			0.25	0.5	0.25			0	0.666667	0.333333
							lethal
	example 2
	allele frequency						genotype frequency
			pollen
			w	c
			0.5	0.5			zygote					zygote
egg	w	0.5	0.25	0.25			ww	cw/wc	cc			ww	cw/wc	cc
	c	0.5	0.25	0.25			0.25	0.5	0.25			0.1	0.25	0.65
							reduced fitness	reduced fitness
D	Female and male gametophytic TRD
	allele frequency						genotype frequency
			pollen
			w	c
			0.2	0.8			zygote
egg	w	0.2	0.04	0.16			ww	cw/wc	cc
	c	0.8	0.16	0.64			0.04	0.32	0.64
Figure S2 Examples of the effect of gametophytic and zygotic transmission ratio distortion (TRD) on the allele and genotype frequency in gametes and zygotes.
(A) Expected allele and genotype frequency under Mendelian segregation.
(B) Theoretical example of a female gametophytic TRD with preference for L. sativa alleles. The frequency of the heterozygous genotype is not distorted;
only the frequencies of the homozygous genotypes are distorted.
(C) Theoretical examples of a zygotic TRD. Example 1: lethality of the homozygous L. saligna 'ww'-genotype, resulting in distorted segregation of all genotypes.
Example 2: reduced fitness of the homozygous L. saligna 'ww'-genotype and the heterozygous 'cw'/'wc' -genotype, resulting in distorted segregation of all genotypes.
(D) Theoretical example of a female and male gametophytic TRD with equal bias in favor of L. sativa alleles, resulting in distorted segregation of all genotypes.
'w': L. saligna allele
'c': L. sativa allele
yellow highlight of heterozygous genotype

## Sheet: Fig S3 
Figure S3. Comparison of genotype frequencies and TRD per marker in two BC1 and one F2 population of the cross L. saligna CGN05271 x L. sativa cv Olof
Black dots above the dashed threshold line indicate TRD with deviation from Mendelian segregation (p<0.003; BC1 Chi2 > 8.8; F2 Chi2 > 11.6).
Arrows indicate peak loci with significant transmission ratio distortion (TRDL) with a bias towards L. sativa (in blue) or towards L. saligna (in red).
For the F2 population: single-headed arrows refer to non-distortion of heterozygotes frequency, i. e. indication of gametophytic barrier; and double-headed arrows point at TRDL with distortion of heterozygote frequency, i. e. indication of zygotic barrier.
X-axis: nine linkage groups in cM separated by white space. freq = frequency. Genetic nomenclature: 'cc'= homozygous L. sativa (blue), 'cw'= heterozygous (yellow), 'ww'= homozygous L. saligna (red).
(A) BC1cult: F1 backcrossed to L. sativa
(B) BC1wild: F1 backcrossed to L. saligna
(C) F2 population

## Sheet: Fig S4
Figure S4. Colocation of a transmission ratio distortion locus (TRDL) and a recombination cold spot on LG5.
(A) Genotype frequency of L. saligna (red), heterozygous (yellow), L. sativa (blue) and TRD per marker in an F2 population of L. saligna CGN05271 x L. sativa cv Olof.
Black dots above the dashed threshold line indicate TRD with a deviation from Mendelian segregation (p<0.003)
(B) Plot of physical map ( L. sativa v8; Mb) versus F2 linkage map (cM). It shows a lack of recombination around 98 cM, the same region that showed a severe TRD.

## Sheet: Fig S5
Observed segregations from populations that segregate only for loci on LG4 (4A segment) and/or LG8 (8A segment).
A ‘F2_4A8A’, inbred progeny of genotype' 4cw8cw'							B inbred progeny of genotype '4ww8cw'							C inbred progeny of genotype '4cw8cc'
	LG8							LG8	Chi2= 0.02, p=0.99, concl: Mendelian segregation						LG8	Chi2=8.2 ,p=0.02, concl: distorted segregation
LG4	cc	cw/wc	ww	sum	geno freq	allele freq	LG4	cc	cw/wc	ww	sum	geno freq	allele freq	LG4	cc	cw/wc	ww	sum	geno freq	allele freq
cc	75	0	0	75	0.11811	c=0.32	cc	n/a	n/a	n/a	0	0	c=0.0	cc	41	n/a	n/a	41	0.347458	c=0.59
cw/wc	126	130	0	256	0.40315		cw/wc	n/a	n/a	n/a	0	0		cw/wc	58	n/a	n/a	58	0.491525
ww	80	151	73	304	0.47874	w=0.68	ww	137	271	137	545	1	w=1.0	ww	19	n/a	n/a	19	0.161017	w=0.41
sum	281	281	73	635			sum	137	271	137	545			sum	118	0	0	118
geno freq	0.44252	0.44252	0.114961				geno freq	0.251376	0.497248	0.251376				geno freq	1	0	0
allele freq	c=0.66		w= 0.34				allele freq	c=0.50		w=0.50				allele freq	c=1.0		w=0.0
Expected segregation ratios according to hypotheses
D H1: Chi2= 395, p=0, rejected							E H2: Chi2= 4.6, p=0.8, not rejected							F H3: Chi2= 74, p=0, rejected
	LG8							LG8							LG8
LG4	cc	cw/wc	ww	sum	geno freq	allele freq	LG4	cc	cw/wc	ww	sum	geno freq	allele freq	LG4	cc	cw/wc	ww	sum	geno freq	allele freq
cc	39.6875	79.375	39.6875	158.75	0.25	c=0.50	cc	70.5556	0	0	70.5556	0.111111	c=0.33	cc	57.7273	0	0	57.7273	0.0909091	a=0.36
cw/wc	79.375	158.75	79.375	317	0.499213		cw/wc	141.111	141.111	0	282.222	0.444444		cw/wc	115.455	230.909	0	346.364	0.545455
ww	39.6875	79.375	39.6875	158.75	0.25	w=0.50	ww	70.5556	141.111	70.5556	282.222	0.444444	w=0.67	ww	57.7273	115.455	57.7273	230.909	0.363636	b=0.64
sum	158.75	317	158.75	635			sum	282.222	282.222	70.5556	635			sum	230.909	346.364	57.7273	635
geno freq	0.25	0.499213	0.25				geno freq	0.444444	0.444444	0.111111				geno freq	0.363636	0.545455	0.0909091
allele freq	c=0.50		w=0.50				allele freq	c=0.67		w=0.33				allele freq	a=0.64		b=0.36
G H4: Chi2= 165, p=0, rejected							H H5: Chi2= 31, p=0.0001, rejected							I H6: Chi2=193, p=0, rejected
	LG8							LG8							LG8
LG4	cc	cw/wc	ww	sum	geno freq	allele freq	LG4	cc	cw/wc	ww	sum	geno freq	allele freq	LG4	cc	cw/wc	ww	sum	geno freq	allele freq
cc	52.9167	52.9167	0	105.833	0.166667	c=0.42	cc	63.5	0	0	63.5	0.1	c=0.35	cc	33.147	33.2105	8.636	74.9935	0.118098	c=0.32
cw/wc	105.833	158.75	52.9167	317.5	0.5		cw/wc	127	190.5	0	317.5	0.5		cw/wc	113.093	113.347	29.4005	255.841	0.402893
ww	52.9167	105.833	52.9167	211.667	0.333333	w=0.58	ww	63.5	127	63.5	254	0.4	w=0.65	ww	134.441	134.747	34.9885	304.176	0.479009	w=0.68
sum	211.667	317.5	105.833	635			sum	254	317.5	63.5	635			sum	280.681	281.305	73.025	635.011
geno freq	0.333333	0.5	0.166667				geno freq	0.4	0.5	0.1				geno freq:	0.44201	0.442992	0.114998
allele freq	c=0.58		w=0.42				allele freq	c=0.65		w=0.35				allele freq	c=0.66		w= 0.34
J backcross population of cross '4cw8cw' x '4ww8cc'							K Reciprocal backcross population of cross '4ww8cc' x '4cw8cw'
Informative for female side of transmission							Informative for male side of transmission
				H1	H2						H1	H2
	male	Obs	Obs	Exp	Exp			female	Obs	Obs	Exp	Exp
female	4w8c	abs	freq	abs	abs		male	4w8c	abs	freq	abs	abs
4c8c	4cw8cc	31	0.264957	29.25	39		4c8c	4cw8cc	46	0.328571	26	39
4c8w	4cw8wca	2	0.017094	29.25	0		4c8w	4cw8wc	0	0	26	0
4w8c	4ww8cc	47	0.401709	29.25	39		4w8c	4ww8ccb	62b	0.44b	26	39
4w8w	4ww8wc	37	0.316239	29.25	39		4w8w	4ww8wc	32	0.23	n/a	n/a
	total	117		116	117			total	140		78	78
			Chi2	39	3.4					Chi2	43	2.5
			p-value	0	0.34					p-value	0	0.28
				rejected	not rejected						rejected	not rejected
Figure S5. Hypothesis testing for transmission ratio distortion (TRD) of inbred progeny ‘F2_4A8A’ (n=635)
Genetic nomenclature: 'c'= L. sativa allele, 'w'= L. saligna allele; 'cc'= homozygous L. sativa genotype, 'cw'/'wc'= heterozygous genotype, 'ww'= homozygous L. saligna genotype
Genotype plant numbers are colour-shaded from low (red) to high (green) numbers.
geno freq = genotype frequency, allele freq = allele frequency, concl = conclusion, n/a = not applicable
Observed segregations of populations that segregate for LG4 and/or LG8:
(A) 'F2_4A8A', the inbred progeny of double heterozygote '4cw8cw'
(B) Inbred progeny of '4ww8cw', i. e. segregation for LG8 only. The segregation ratio is compared with Mendelian segregation (1:2:1) in a chi-square (Chi2) test.
(C) Inbred progeny of '4cw8cc', i. e. segregation for LG4 only. The segregation ratio is compared with Mendelian segregation (1:2:1) in a chi-square test.
The observed segregation of 'F2_4A8A' in panel (a) is compared to expected segregation ratios based on six hypotheses for TRD:
(D) H1 = Hypothesis 1: Mendelian segregation of 1:2:1 with expected allele frequencies of 0.5 for both loci.
(E) H2 = Hypothesis 2: distorted segregation by non-transmission of male and female gametophytes with the heterospecific haploid genotype '4c8w'.
(F) H3 = Hypothesis 3: distorted segregation by absence through lethality of the genotypes: '4cc8cw',' 4cc8ww' and '4cw8ww'.
(G) H4 = Hypothesis 4: distorted segregation by non-transmission of either male or female gametophytes with the heterospecific haploid genotype '4c8w'.
(H) H5 = Hypothesis 5: Hypothesis 3 and 4 combined.
(I) H6 = Hypothesis 6: distorted segregation through actual allele frequencies that were deviant from Mendelian allele frequencies of 0.5 on both loci . Actual allele frequencies were derived from the observed segregation in panel (a).
Validation of the accepted H2 for 'F2_4A8A' through independent populations and from the male and female side separately:
(J, K) we compared the observed segregation in reciprocal backcross populations of the cross '4cw8cw' x '4ww8cc' to H1: Mendelian segregation with ratio 1:1:1:1 and to H2: see explanation in (e) . The presumed non-transmitted gametophyte is underlined.
obs = observed, exp = expected
a in (J) two plants with '4cw8wc' genotype were observed, that are probably due to a selfing of the mother plant instead of a backcross. An additional four plants with '4cc8cc' genotype (not shown) were detected as well, which can only be derived from a selfing of the mother plant.
The other three observed genotypes might also contain some plants of selfings besides backcross plants.
b in (K) the plant number of the '4ww8cc' genotype is much higher than expected for both hypotheses. This observation can be explained by the fact that '4ww8cc' is the only genotype category in which the number of plants can be overestimated due to occurrence of selfings of the mother plant.
Because the actual number of backcross plants cannot be distinguished from plants generated by selfing, this genotype class is excluded from the chi-square test.

## Sheet: Fig S6 
A recombinant genotype is informative by its own genotype:													B recombinant genotype is informative by its inbred progeny
Examples of 3 recombinant genotypes:													Examples of 2 recombinant genotypes:
			genotype
			LG4			LG8									genotype of
informative genotype: '4cc8ww' ---->			c	c		w	w								motherplant
			c	c		w	w
			w	w		w	w								LG4			LG8
	LG4 new HI interval <-----		w	w		w	w								c	w		c	c
			w	w		w	w								c	w		c	c		---> LG8 new HI interval
			w	w		w	w								c	w		c	c
															c	w		c	w		phenotype after selfing: normal seed set & no TRD in inbred progeny
			c	w		c	w								c	w		c	w		Conclusion: HI maps outside the region of the double heterozygous genotype
	LG4 new HI interval <-------		c	w		c	w								c	w		c	w
			c	w		c	w
			c	w		c	w
			c	c		c	w
informative genotype: '4cc8cw' ---->			c	c		c	w								c	w		c	w
													LG4 new HI interval <----		c	w		c	w
			c	w		c	w								c	w		c	w		phenotype after selfing: 25% reduced seed set & TRD in inbred progeny
			c	w		c	w		---> LG8 new HI interval						w	w		c	w		Conclusion: HI maps within the region of the double heterozygous genotype
			c	w		c	w								w	w		c	w
			c	w		w	w								w	w		c	w
informative genotype: '4cw8ww' ---->			c	w		w	w
			c	w		w	w
Figure S6. Mapping approaches for a pairwise genetic incompatibility, i. e. hybrid incompatibility
In the genotyped F2 populations (interspecific F2 and 'F2_4A8A') we identified plants with a recombinant genotype within one of the original HI intervals that were limited by the segment borders of the 8A and 4A segments.
Here example recombinant genotypes are shown within the original HI intervals (colored bars) each with imaginary genotype scores of six markers. HI intervals comprise the original 27-cM and 26-cM intervals of 4A and 8A segment respectively.
Numbers 4 and 8 indicate linkage group 4 and 8. Red is L. saligna allele, blue is L. sativa allele.
Genetic nomenclature: 'c'= L. sativa allele, 'w'= L. saligna allele; 'cc'= homozygous L. sativa genotype, 'cw'/'wc'= heterozygous genotype, 'ww'= homozygous L. saligna genotype.
Genotypes with a recombination within the original HI map interval can reduce the map interval:
(A) directly by its genotype.
	The HI is manifested as TRD with absence of three genotypes: '4cc8ww', '4cc8cw', '4cw8ww'.
	Observation of one of these three genotypes indicates that the HI locus is outside the region of this genotype.
(B) indirectly by its inbred progeny
	Observation after selfing of the recombinant genotype:
	1) 25% reduced seed set & TRD (with absence of '4cc8ww', '4cc8cw', '4cw8ww' genotypes) --> Conclusion: HI maps within the region of the double heterozygous genotype
	2) normal seed set & Mendelian segregation --> Conclusion: HI maps outside the region of the double heterozygous genotype
Note for (b): segregation data of the inbred progeny is provided by genotype scores of genetic markers that are located within the region of double heterozygous genotype in the recombinant mother plant.

## Sheet: Fig S7
					Control genotypes:													Recombinant genotypes:
marker	LG	Mb	cM		L. sativa cv Olof				L. saligna				'4cw8cw'-genotype					rec 1 genotype					rec 2 genotype					rec 3 genotype				New HI intervals:
NL1260	4	6909803	2.883		c	c			w	w			c	w				c	c				c	w				c	w
NL0514	4	14305793	4.4		c	c			w	w			c	w				c	c				c	w				c	w
CLSS5115	4	17599772	5.1		c	c			w	w			c	w				w	w				c	w				c	w			LG4 new HI interval
CLS_S3_Contig2928	4	19845708	5.1		c	c			w	w			c	w				w	w				c	w				c	w
CLS_S3_Contig7615	4	22290985	5.6		c	c			w	w			c	w				w	w				c	c				c	w
QGB14G14.yg.ab1_2	4	22669869	6.9		c	c			w	w			c	w				w	w				c	c				c	w
QGA12B18.yg.ab1_2	4	23691392	7.1		c	c			w	w			c	w				w	w				c	c				c	w
CLS_S3_7127	8	220068	0		c	c			w	w			c	w				w	w				c	w				c	c
NL0833	8	1571774	3.396		c	c			w	w			c	w				w	w				c	w				c	c			LG8 new HI interval
CLS_S3_6649	8	2993565	3.4		c	c			w	w			c	w				w	w				c	w				c	c
NL0418	8	5282245	4.663		c	c			w	w			c	w				w	w				c	w				c	w
LE1211	8	6621520	5.1		c	c			w	w			c	w				w	w				c	w				c	w
CLS_S3_Contig1511	8	8953280	5.7		c	c			w	w			c	w				w	w				c	w				c	w
Ls_v8_lg_8_017046190	8	17046190	9.5		c	c			w	w			c	w				w	w				c	w				c	w
				# plants	9				9				5					3					2					1
	Seed set observations			# flowers tested	45				63				25					n/a					25					15
				% of aborted seeds	7				4				29					n/a					30					4
				statistical group (Tukey)	a				a				b					n/a					b					a
				# of plants per genotype in inbred progeny of recombinant mother plant:
				4cc8cc									75										8					8
				4cc8cw *									0										0					11
				4cc8ww *									0										0					7
				4cw8cc									126										19					11
Observed segregation for inbred progeny				4cw8cw									130										20					20
* non-transmitted genotype in HI region				4cw8ww *									0										0					8
				4ww8cc									80										6					4
				4ww8cw									151										18					14
				4ww8ww									73										6					5
				total plant number									635										77					88
Hypothesis testing				Chi2 O vs E. H1: Mendelian									395 (p=0)										43 (p=0)					3.8 (p=0.9)
				Chi2 O vs E. H2: non-transmission '4c8w' gamete									4.6 (p=0.8)										2.4 (p=1.0)					n/a
				conclusion segregation									distorted										distorted					Mendelian
				Conclusion HI :	no HI				no HI				HI					n/a					HI					no HI
Figure S7. Recombinants reduce HI map intervals for LG4 to 4.4-5.6 cM and for LG8 to 0.0-4.7 cM.
Horizontal dashed lines: smaller HI interval identified from recombinants in the interspecific F2 population (L. saligna CGN05271 x L. sativa cv Olof).
Horizontal solid lines: even smaller HI intervals from recombinants in 'F2_4A8A'.
Short thick black lines indicate most informative cross-overs per Linkage group.
Genetic nomenclature: 'c'= L. sativa allele, 'w'= L. saligna allele; 'cc'= homozygous L. sativa genotype, 'cw'/'wc'= heterozygous genotype, 'ww'= homozygous L. saligna genotype.
Prefix numbers (4 and 8) indicate the linkage group (LG) 4 and LG8
The two recombinant genotypes (rec1 and rec2) that reduced the map interval on LG4 the most, were directly informative by its genotype: rec1 by '4cc8ww' genotype and rec2 by '4cc8cw' genotype (indicated by orange connector lines)
The recombinant genotype (rec3) that reduced the map interval on LG8 the most, was indirectly informative by its inbred seeds. Its inbred progeny displayed normal seed set and Mendelian segregation and therefore the HI must map outside of the interval of the double heterozygous genotype at LG8.
Percentages of aborted seeds are colour-shaded from low (green) to high (red) numbers to facilitate interpretation
O: observed, E: expected, Chi2: chi-square test value, n/a: not applicable, orange shading: genotypes absent in the HI region.
Note: segregation data of the inbred progeny is provided by genotype scores of genetic markers that are located within the region of double heterozygous genotype in the recombinant mother plant.
